## **High-Resolution Single-Molecule FRET via DNA eXchange (FRET X)**

Mike Filius, Sung Hyun Kim, Ivo Severins and Chirlmin Joo<sup>#</sup>

Department of BioNanoScience, Kavli Institute of Nanoscience, Delft University of Technology, van der Maasweg 9, 2629HZ Delft, The Netherlands.

<sup>#</sup> Correspondence should be addressed to [c.joo@tudelft.nl](mailto:c.joo@tudelft.nl)

### **Keywords:**

**Single-molecule FRET, structural biology, DNA nanotechnology, DNA-PAINT, FRET X**

### **ABSTRACT**

**Single-molecule FRET is a versatile tool to study nucleic acids and proteins at the nanometer scale. However, currently, only a couple of FRET pairs can be reliably measured on a single object. The limited number of available FRET pair fluorophores and complicated data analysis makes it challenging to apply single-molecule FRET for structural analysis of biomolecules. Currently, only a couple of FRET pairs can be reliably measured on a single object. Here we present an approach that allows for the determination of multiple distances between FRET pairs in a single object. We use programmable, transient binding between short DNA strands to resolve the FRET efficiency of multiple fluorophore pairs. By allowing only a single FRET pair to be formed at a time, we can determine the FRET efficiency and pair distance with sub-nanometer resolution. We determine the distance between other pairs by sequentially exchanging DNA strands. We name this multiplexing approach FRET X for FRET via DNA eXchange. We envision that our FRET X technology will be a tool for the high-resolution structural analysis of biomolecules and other nano-structures.**

## 1 INTRODUCTION

2 X-ray crystallography, nuclear magnetic resonance (NMR) and cryo-electron microscopy are  
3 the golden standard for determining the structure of biomolecules.<sup>1,2</sup> However, minute and  
4 rapid conformational changes often cannot be observed with these techniques, since the  
5 required sample preparation may stabilize a certain conformation of a molecule.<sup>3</sup> In addition,  
6 none of these techniques are capable of detecting rare species in the cell, for which single-  
7 molecule sensitivity is required. Single-molecule FRET can be used to determine the  
8 structure of molecules with sub-nanometer resolution. However, the use of single-molecule  
9 FRET for the analysis of complex molecular structures (e.g. protein tertiary structures) has  
10 been limited since it requires resolving the FRET efficiency of multiple dye pairs.<sup>4,5</sup>  
11 Currently, single-molecule FRET analysis allows us to deal with only one or two FRET pairs  
12 in a single measurement.<sup>6,7</sup> Therefore, structural analysis using single-molecule FRET  
13 requires the preparation of a protein library consisting of many different combinations of dye  
14 locations, rigorous modeling and simulations following the data acquisition.<sup>8-11</sup>

15 Single-molecule multiplexing has been demonstrated with photoswitchable  
16 fluorophores. In this approach, a molecule of interest is labeled with a single donor and two  
17 or more identical acceptor fluorophores. By using photoswitchable acceptor fluorophores,  
18 only one of the acceptors is active at a given time.<sup>12</sup> This method, called photoswitchable  
19 FRET, allows for the detection of multiple FRET pairs in a single nanoscale object and  
20 determination of structures and interactions between biomolecules, from proteins to DNA.  
21 However, the stochastic nature of the photoswitching and the limited number of orthogonal  
22 attachment chemistry strategies for dye labeling are the main obstacles for the wide  
23 adaptation of the method. An alternative way of switching between on and off states of  
24 fluorescent probes is by using fluorophores that bind a target only for short period of time, as  
25 with point accumulation in nanoscale topography (PAINT).<sup>13-15</sup> For example, fluorophores  
26 are attached to short DNA oligos that bind the complementary target strands for several  
27 hundreds of milliseconds. This transient binding is central to the super-resolution technique,  
28 DNA-based point accumulation for imaging in nanoscale topography (DNA-PAINT).<sup>16-19</sup>

29 Here we propose a new single-molecule structural analysis tool that can resolve the  
30 FRET efficiency of multiple pairs in a single target molecule. By using programmable,  
31 transient binding between short DNA strands, a single FRET pair is formed at any given time  
32 allowing for distance determination between the momentarily activated fluorophore pair. By  
33 repeating the imaging cycle, we can resolve multiple points of interest (POI) in a single

34 nanoscale object. We demonstrate the proof of concept of sub-nanometer resolution single-  
35 molecule structural analysis on DNA structures.

36

37

## 38 RESULTS

39 To demonstrate the concept of FRET via DNA imager strands, we first tested single molecule  
40 FRET measurements with a transiently binding dye-labeled DNA imager strand. We  
41 designed an assay where an acceptor (Cy5)-labeled single-stranded (ss) DNA strand is  
42 immobilized on a quartz slide through biotin-streptavidin conjugation (**Figure 1A**). The  
43 measurements yielded a distinct FRET signal upon binding between a donor-labeled imager  
44 strand and the immobilized target strand (**Figure 1B**). The FRET signals were recorded using  
45 total-internal-reflection microscopy. The imager strand sequence was chosen such that the  
46 binding events between the two DNA strands would have a short dwell-time to allow for  
47 frequent replenishment of the imager strand (**Figure 1C**). This allows for the same POI to be  
48 probed multiple times. At the same time, the dwell-time of the binding events between the  
49 imager and immobilized strands was chosen to be several hundred milliseconds or longer for  
50 precise determination of the FRET efficiency.

51 To visualize the FRET efficiency of each dye pair appearing in a field of view, we  
52 built a FRET kymograph (**Figure 1D and Supplementary Figure 1A**). The kymograph  
53 shows the FRET efficiency per data point (**Figure 1D, lines**) and the mean FRET efficiency  
54 from all data points per binding event (**Figure 1D, dots**). A FRET histogram built from the  
55 mean values is fitted with a single Gaussian distribution (**Figure 1D, bottom**) ( $E = 0.72$  with  
56 a standard deviation of 0.01). The ensemble kymograph built from all 363 molecules for this  
57 construct shows a similar mean FRET of  $0.71 \pm 0.02$  (**Supplementary Figure 1B**).

58 Structural analysis of complex biomolecules using single molecule FRET requires the  
59 detection of multiple FRET pairs in a single object. To avoid the crosstalk between different  
60 FRET pairs, each POI should be measured for a short amount of time using short DNA  
61 imager strands, thereby separating the FRET binding events of each pair in time. Therefore,  
62 we designed donor-labeled imager strands that can interact with a single POI only for 2-3  
63 seconds (**Supplementary Figure 2A and B**), which is long enough to determine the FRET  
64 efficiency. We designed a ssDNA construct with two target sequences. The binding of a  
65 donor-labeled imager strand to the ssDNA construct yielded either a high or a medium FRET  
66 signal (**Figure 2A**). For a target construct that consisted of two POIs that were spaced by a 5-  
67 nt linker (**Figure 2B**), two FRET peaks were observed (**Figure 2D**), reporting on the location

68 of each POI. However, when the two POIs were placed with no linker sequence in between  
 69 (**Figure 2C**), the FRET histogram became unresolvable (**Figure 2E**). We conclude that it is  
 70 not feasible to determine the pair distances of several POIs with high spatial resolution using  
 71 a single imager strand.

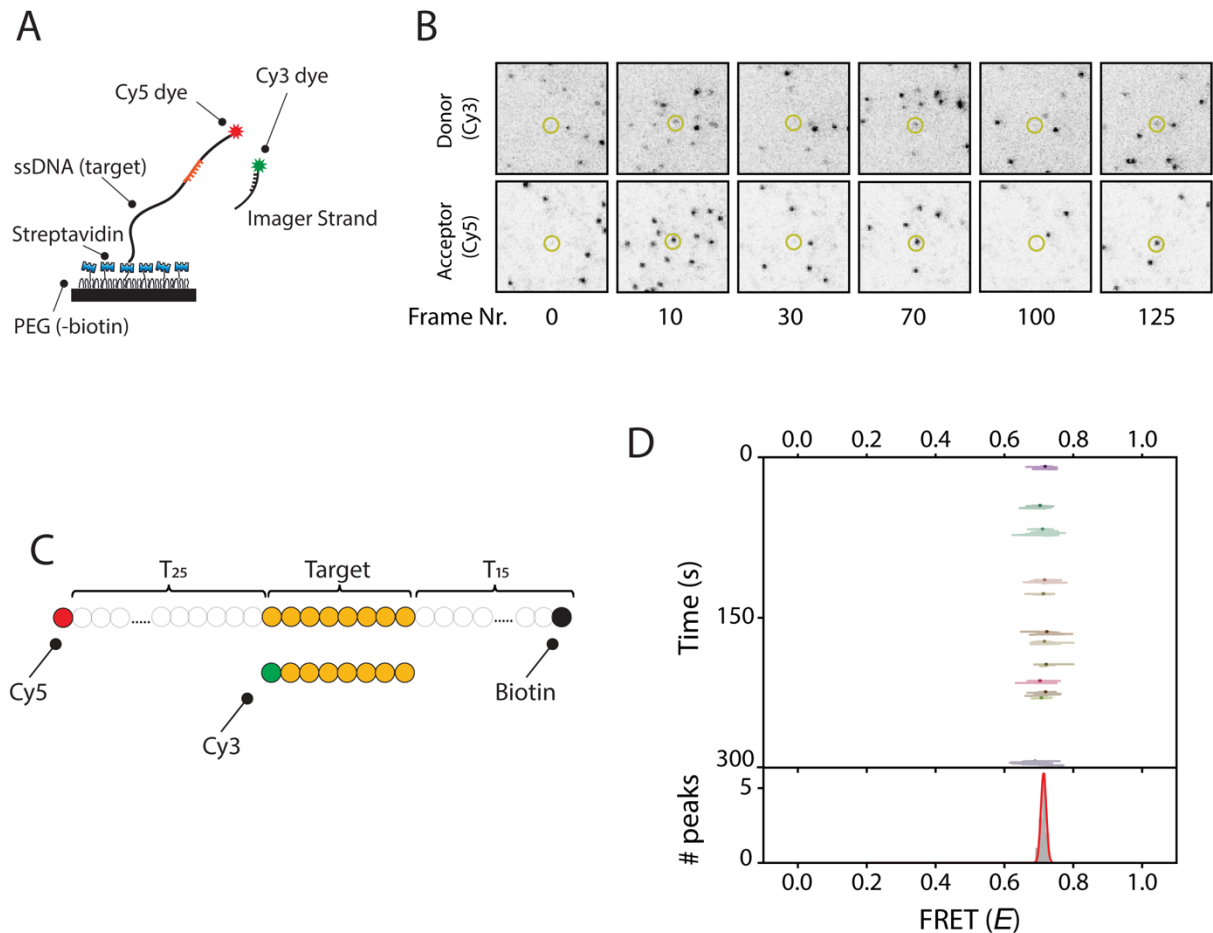

72

73 **Figure 1: Repetitive binding of short DNA imager strand allows for high-detection precision for Single Molecule**  
 74 **FRET.**

75 A) Schematic representation of the single-molecule FRET assay. An acceptor (Cy5, red star) labeled single-stranded target  
 76 DNA construct is immobilized on a PEGylated surface through biotin-streptavidin conjugation. Binding of the donor (Cy3,  
 77 green star) labeled imager strand results in short FRET events and is observed using total internal reflection microscopy.

78 B) A series of CCD snapshots obtained from a single-molecule movie with 100 ms exposure time. The top row represents  
 79 the donor channel, and the bottom row represents the acceptor channel. Each dot represents a single molecule. Dynamic  
 80 binding of the imager strands can be observed over time (highlighted molecule).

81 C) Schematic representation of the ssDNA constructs. Upon binding of the imager strand, the donor fluorophore is separated  
 82 from the acceptor by a 25-nt thymine linker.

83 D) Single-molecule FRET kymograph from a time trace from one single molecule (highlighted molecule from Fig. 1B). The  
 84 kymograph shows the FRET efficiency for each data point in a binding event (lines) and the mean FRET efficiency from all  
 85 data points per binding event (dots) as a function of time. All mean FRET efficiencies are plotted in a histogram and fitted  
 86 with a Gaussian function (bottom panel).

87

88

89 To achieve higher spatial resolution, we sought to detect the different POIs  
90 independently so that the overlapping FRET peaks can be obtained separately and fitted more  
91 precisely. As illustrated in **Figure 2F**, each POI was measured using a unique short DNA  
92 imager strand. After the binding events for the first POI were recorded for several minutes,  
93 the imager strand was exchanged by washing the microfluidic chamber and injecting a unique  
94 DNA imager strand for the second POI (**Figure 2F**). This process can be repeated for any  
95 number of POIs. We name this “FRET X” for FRET via DNA eXchange.

96 To demonstrate the concept of FRET X, we designed ssDNA constructs with two  
97 POIs, each containing a unique target sequence. The POIs were separated by a 5-nt thymine  
98 (**Figure 2G**) linker or were in closer proximity with no linker in between (**Figure 2H**). In the  
99 first round of FRET X detection we determined the FRET peak to be at 0.74 for POI B  
100 located 35 nucleotides away from the acceptor (**Figure 2I top panel**). Next, the microfluidic  
101 chamber was washed and the imager strand complementary to the POI A was injected. In the  
102 second round of FRET X imaging, we observed a single FRET peak at 0.88 reporting on the  
103 second POI that was separated from POI B by a 5-nt thymine linker (**Figure 2I, bottom  
104 panel**). As shown in **Figure 2H**, FRET X allows for the accurate detection of the FRET  
105 efficiencies of both POIs, even when they not separated by a linker and this are in closer  
106 proximity. These FRET peaks could not be distinguished using conventional FRET, as shown  
107 in **Figure 2E**. In the first round of FRET X we observed a FRET peak at 0.73 for POI B  
108 (**Figure 2J, top panel**) and in the second round we observed a FRET peak at 0.81 for POI A  
109 (**Figure 2J, bottom panel**). Each histogram showed a wide distribution of ~ 10%p (the  
110 standard deviation) of the peak. However, the Gaussian fit can be used to resolve the center  
111 of a peak with high accuracy of ~1%p (standard error of mean) and is dependent on the  
112 number of binding events (**Supplementary Figure 3**). The resolved FRET values for each  
113 POI can be plotted as the FRET fingerprint of the measured object (**Figure 2K**).

114 To further investigate the achievable resolution of FRET X, we designed a series of  
115 imager strands in which the position of the donor fluorophore is altered by only a single base  
116 among the different imager strands (**Figure 3A**). The FRET X cycle was then repeated for all  
117 nine imager strands. The center of a peak of each histogram was determined by fitting with a  
118 single Gaussian function and the obtained fingerprint showed nine separated peaks, one for  
119 each donor-labeled nucleotide (**Figure 3 B-J**).

120

121

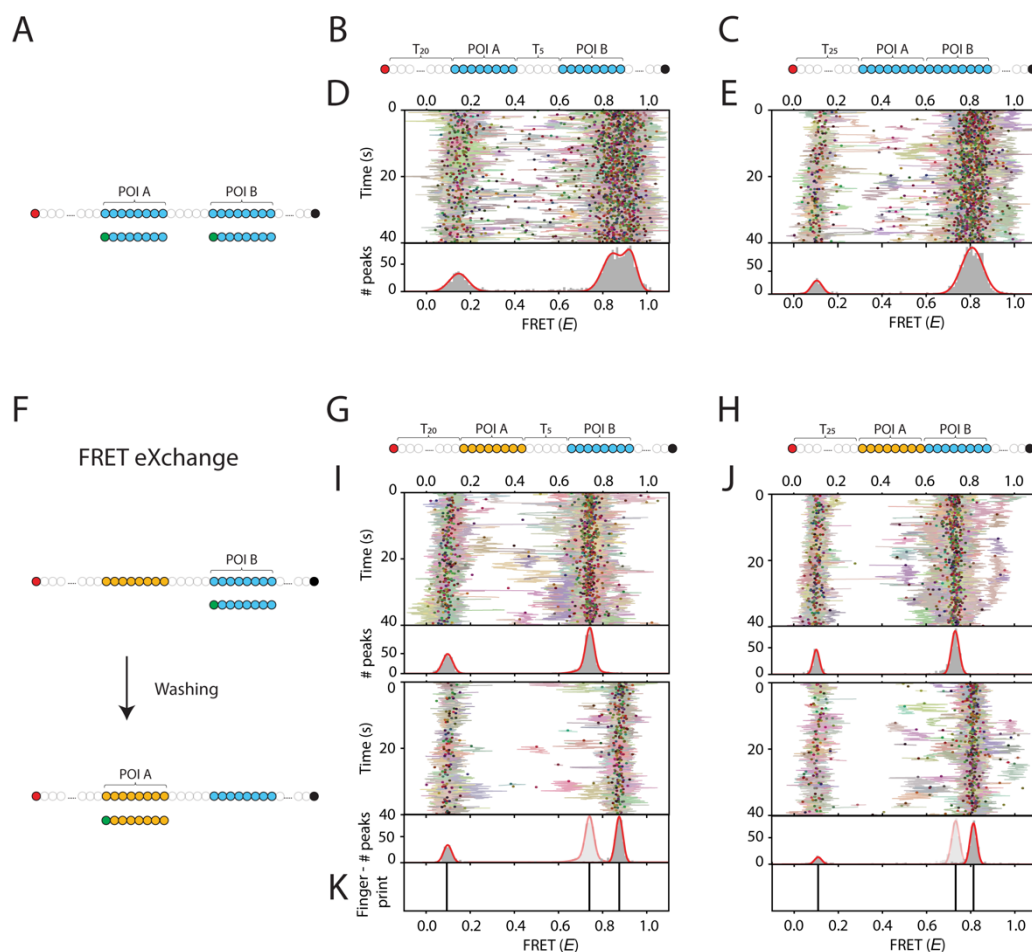

122

123 **Figure 2: FRET by eXchange of unique imager strands allows for high spatial resolution of multiple POIs in a single**  
 124 **nanoscale object.** A) Schematic representation of the single-molecule experiments with two target sequences. A single  
 125 imager strand is used that can bind to both of the POIs in a target molecule. An acceptor (Cy5, red circle) labeled ssDNA  
 126 construct contains two POIs. Binding of the donor (Cy3, green circle) labeled imager strand results in either high FRET  
 127 (when binding to POI A) or mid FRET (when binding to POI B).

128 B and C) Schematic representation of the target constructs in which two POIs are separated by a 5 Thymine linker (Fig. 2B)  
 129 or in which the two POIs are directly connected to each other (Fig. 2C).

130 D) Single-molecule kymograph of the ssDNA target construct from Fig. 2B. Top panel shows the binding events obtained  
 131 for all molecules in a single field of view. Bottom panel shows a FRET histogram consisting of a donor-only peak and two  
 132 additional FRET peaks reporting on the location of each POI with respect to the acceptor fluorophore.

133 E) The single-molecule kymograph of the ssDNA target construct from Fig. 2C. Using the same imager strand for both POI  
 134 does not allow for the detection of the position of both POIs when they are in close proximity. The FRET histogram shows a  
 135 broad peak at 0.81.

136 F) Schematic workflow of FRET by eXchange of imager strand (or FRET X). A ssDNA target constructs consists of two  
 137 POIs with unique DNA binding sequences, allowing us to measure the POIs one at a time. In a first round of detection, the  
 138 imager strand for POI B (blue circles) is added and imaged for 5 minutes. Then the microfluidic chamber is washed and an  
 139 imager strand for POI A (orange circles) is added.

140 G and H) Schematic representation of the FRET X target constructs, in which two unique POI sequences blue circles (POI  
 141 B) or orange circles (POI A) are separated by a 5 nt thymine linker (Fig. 2G) or in which the two POIs are directly adjacent  
 142 (Fig. 2H).

143 I and J) Single molecule kymographs for the FRET X for constructs in Fig. 2G and 2H. FRET X imaging allows for the  
 144 determination of each POI in a separated round. For a construct in which the POIs were separated by a 5 nt thymine linker  
 145 we observed a distinct FRET peak at 0.73 (Fig. 2I, top panel) and 0.88 (Fig. 2I, bottom panel) for POI A and B, respectively.  
 146 FRET X allows for the accurate detection of POIs even when they are in closer proximity. We observed distinct FRET peaks  
 147 of 0.73 (Fig. 2J, top panel) and 0.81 (Fig. 2J, bottom panel) for POI A and B, respectively.

148 K) The Gaussian fits of individual histograms for each POI obtained using the FRET X approach allows for the  
 149 determination of the center of a peak with 1 %p (or  $\Delta E \sim 0.01$ ) precision. The centres of the peaks are plotted in a separate  
 150 panel, which we name the FRET fingerprint of a nanoscale object.

151

152 To determine the precision that can be obtained using our FRET X approach, the standard  
 153 error of the FRET efficiency was plotted as a function of the number binding events. The  
 154 chosen events were from an imager strand labeled at position 5 (**Figure 3F**) that yielded a  
 155 FRET efficiency value of 0.65. We found that the center of a Gaussian fit can be determined  
 156 with a precision of 1%p (or  $\Delta E \sim 0.01$ ) after obtaining >10 binding events (**Figure 3K**). The  
 157 reproducibility of FRET X was demonstrated by measuring all nine labeled imager strands on  
 158 different days. As shown in **Figure 3L**, the standard deviation between the measurements  
 159 made on different days is about 2%p per each construct.

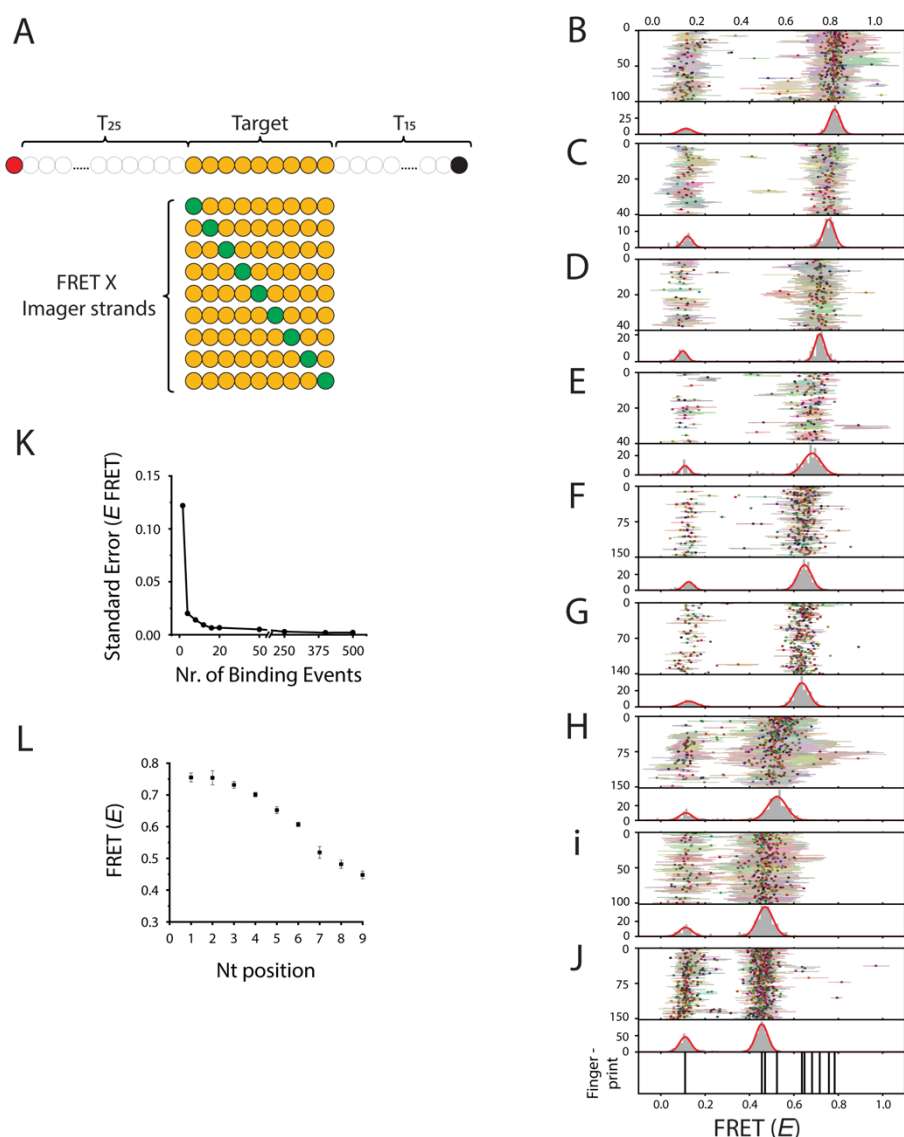

160

161 **Figure 3: Single nucleotide resolution can be achieved with FRET X.** A) Schematic representation of the single-molecule  
 162 constructs used for the determination of different POIs separated by a single base pair. An acceptor (Cy5, red circle) labeled  
 163 ssDNA target construct consisting of a 9 nt target sequence (orange circles) where each imager strand can bind. A series of  
 164 donor (Cy3, green circles) labeled FRET X imager strands. The position of each POI (or nucleotide) in the target sequence  
 165 will be determined one by one using our FRET X approach.

166 B-J) Kymographs for each of the POIs determined using FRET X. The top kymograph is obtained with the imager strand  
 167 where the donor fluorophore binds closest to the acceptor (separated by a 25-thymine linker). Each next kymograph is  
 168 obtained with a subsequent imager strand where the distance to the acceptor increases by a single base pair. We obtained

169 nine separated FRET histograms, one for each of donor labeled base pairs using FRET X. The bottom panel shows nine  
170 clearly separated peaks in the FRET fingerprint. The fingerprint shows the center of each Gaussian fit that was obtained  
171 using our FRET X approach.  
172 K) Standard error of the FRET X efficiency for imager strand 5 (Fig. 3F) vs the number of binding events. We observe that  
173 we can determine the center of a Gaussian fit with a FRET X precision of  $\Delta E \sim 0.01$  after  $>10$  binding events.  
174 L) The mean FRET X efficiency for each of the POIs determined on different days. We find good reproducibility for FRET  
175 X. Mean FRET efficiencies and standard deviation are calculated from 3 independent experiments.

176

177 Finally, to demonstrate the potential to use FRET X for structure analysis at the single  
178 molecule level, we designed two ssDNA constructs with structural differences and tested  
179 whether individual molecules can be distinguished when the two are randomly mixed. The  
180 ssDNA constructs consist of two POIs, one of which is located at an identical position on the  
181 two DNA constructs. The second POI is connected to the side of one of the nucleotides in the  
182 backbone sequence and has a different location on the two constructs (**Figure 4A and**  
183 **Supplementary Figures 4 and 5**). To avoid the photobleaching of the acceptor dye, we  
184 designed a unique sequence near the 3' end of the construct where a complementary acceptor  
185 labeled imager strand can transiently bind. We immobilized a mixture of the two constructs  
186 with 1:1 ratio.

187 In a first round of FRET X, we determined the FRET efficiency for POI A and  
188 observed two distinct FRET populations reporting on the distinct distance between POI A  
189 and the acceptor reference point, depending on the constructs (**Figure 4B**). Next, we washed  
190 the microfluidic chamber and injected the imager strand for POI B. As expected, we observed  
191 a single peak for POI B, reporting on the similar position of POI B for both constructs  
192 (**Figure 4C**). In a final round of FRET X, we confirmed the location of POI A by again  
193 injecting the imager strand for POI A back and observed the same FRET peaks as in the  
194 FRET X imaging rounds 1 (**Figure 4 B and D**).

195 For each individual molecule, we determined the mean FRET efficiency for POI A in  
196 round 1 and compared this with the FRET efficiency obtained for POI A in round 3  
197 (**Supplementary Figure 6**). The majority ( $>80\%$ ) of the individual molecules in the mixture  
198 had a similar resolved FRET efficiency of POI A between rounds 1 and 3, for the medium-  
199 (**Figure 4E**) or high- (**Figure 4F**) FRET constructs. Only a small fraction of molecules did  
200 not show a match between the FRET X rounds due to a different resolved FRET efficiency  
201 for POI A or a lack of imager strand binding events (**Figure 4E and F**). Altogether, these  
202 results show that the FRET X method is capable of detecting the structure of individual DNA  
203 constructs at the single-molecule level.

204



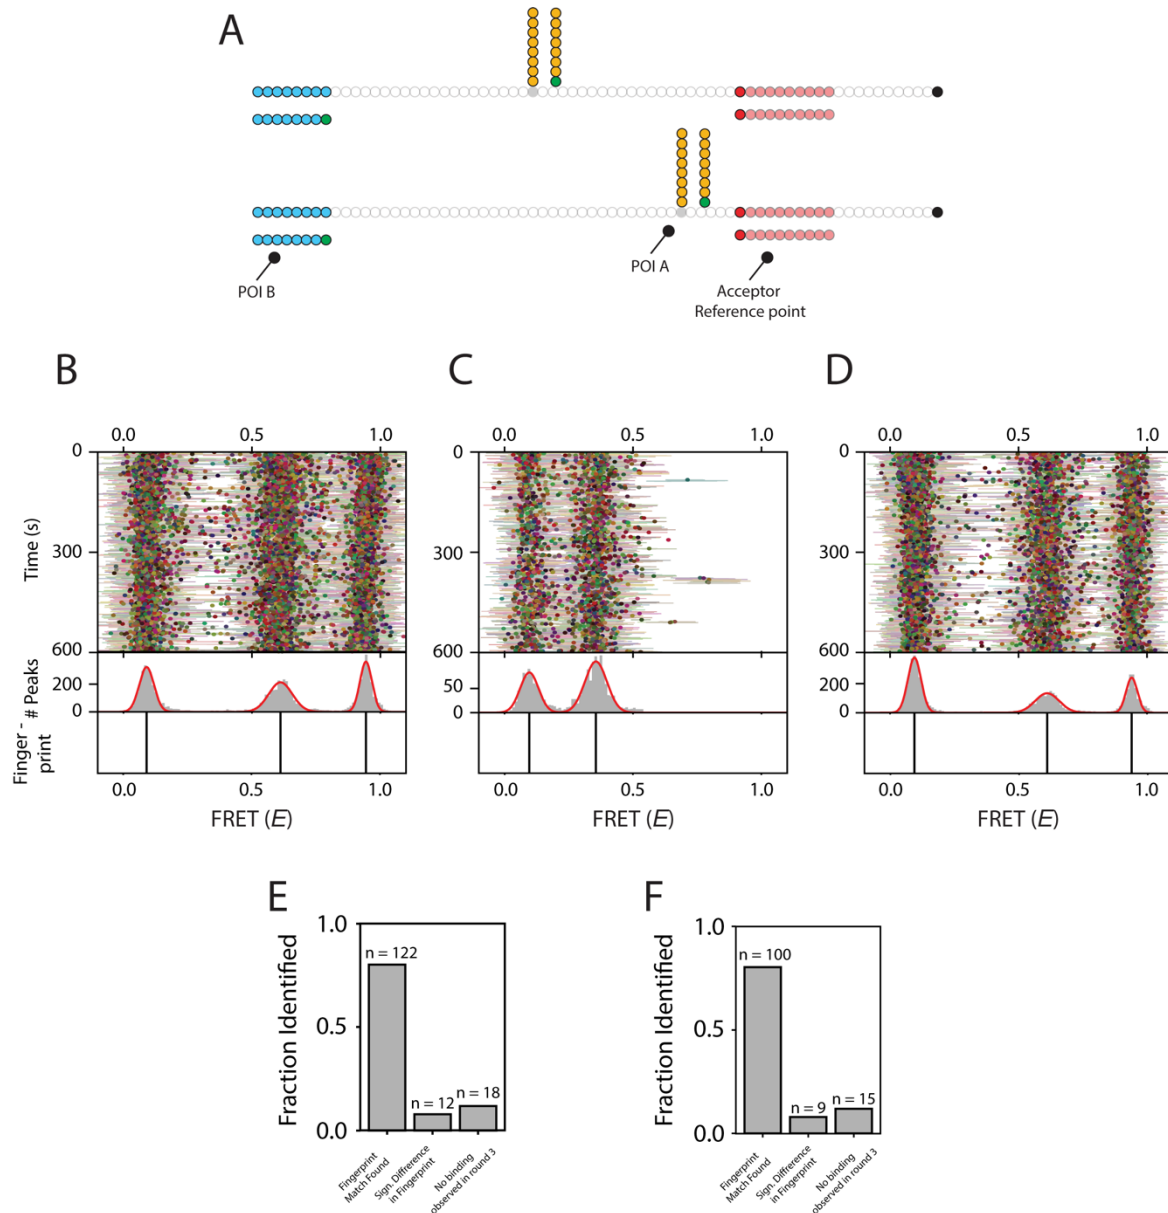

205

206

**Figure 4: Structural analysis of individual molecules using FRET X.**

207

A) Schematic representation of the DNA constructs used for structural analysis. The ssDNA construct contains two POIs, of which one is fixed and has the same location relative to the acceptor on both constructs. The second POI is connected to the side chain of one of the nucleotides in the backbone sequence and has a different location on both constructs.

208

B-D) Kymographs obtained for an equal mixture of the ssDNA constructs immobilized on the slide surface. The FRET X cycle consisted of 3 rounds.

209

B) In a first round of the FRET X cycle, we observed two FRET peaks reporting on the distance of POI A from the acceptor for both constructs.

210

C) The second round of the FRET X cycle resulted in a single peak obtained from FRET between POI B and the acceptor, which is identical in both constructs.

211

D) The last round of the FRET X cycle we confirmed the location of POI A and observed the same FRET peaks as in round 1.

212

E and F) Bar plots showing the fractions of fingerprint matches and non-matches for individual molecules that were identified as medium- (Fig. 4E) or high-FRET construct (Fig. 4F). We determined the mean FRET efficiency of the medium- or high-FRET fingerprint in round 1 and compared this with a detection uncertainty of  $\Delta E \sim 0.07$  with round 3 to find positive matches. The majority of molecules were identified identically between round 1 and 3, for the medium- (Fig. 4E) and high- (Fig. 4F) FRET ssDNA constructs.

213

214

215

216

217

218

219

220

221

222

223

224

## 225 **DISCUSSION**

226 Here we present a proof-of-concept for FRET X, a novel tool for the detection of several  
227 FRET pairs in a single object, which can be used for the structural analysis of biomolecules.  
228 Our FRET X technique relies on the dynamic binding of short fluorescently labeled oligos to  
229 complementary docking sequences on a target object. Conventional single-molecule FRET  
230 techniques report on the changes in distance between a single dye pair on a single molecule.  
231 Multicolor FRET approaches have been developed, but they are often difficult to implement  
232 due to the complex sample preparation and complicated analysis of multispectral  
233 fluorescence signals. In contrast, FRET X uses orthogonal imager strands for different POIs  
234 allowing for the detection of a large number of POIs on a single object.

235         Conventional single-molecule FRET analysis of protein structures is labour intensive  
236 as protein molecules need to be modified for site-selective labeling. We demonstrated that  
237 FRET X can be a tool for the structural analysis of complex biomolecules, since it can report  
238 on the distances of multiple POIs on a single biomolecule. By covalently attaching short  
239 ssDNA strands, which act as FRET X docking strands, to various regions of interest on a  
240 protein, one will be able to detect a large number of residues or domains in a single  
241 experiment. For example, for the analysis of a protein structure, the attachment of FRET X  
242 docking strands can be attached by using orthogonal chemistry for surface-exposed cysteine  
243 or lysine residues in proteins. This method eliminates the need for any complicated  
244 preparative engineering of the biomolecules for site-selective labeling.

245

246

247

## 248 REFERENCES

- 249 1. Shi, Y. A glimpse of structural biology through X-ray crystallography. *Cell* **159**, 995–1014 (2014).
- 250 2. Nogales, E. & Scheres, S. H. W. Cryo-EM: A Unique Tool for the Visualization of Macromolecular Complexity.
- 251 *Mol. Cell* **58**, 677–689 (2015).
- 252 3. Henzler-Wildman, K. A. *et al.* Intrinsic motions along an enzymatic reaction trajectory. *Nature* **450**, 838–844
- 253 (2007).
- 254 4. Algar, W. R., Hildebrandt, N., Vogel, S. S. & Medintz, I. L. FRET as a biomolecular research tool — understanding
- 255 its potential while avoiding pitfalls. *Nat. Methods* **16**, 815–829 (2019).
- 256 5. Lerner, E. *et al.* Toward dynamic structural biology: Two decades of single-molecule Förster resonance energy
- 257 transfer. *Science (80-. )*. **359**, (2018).
- 258 6. Hohng, S., Joo, C. & Ha, T. Single-Molecule Three-Color FRET. *Biophys. J.* **87**, 1328–1337 (2004).
- 259 7. Clamme, J. P. & Deniz, A. A. Three-color single-molecule fluorescence resonance energy transfer. *ChemPhysChem*
- 260 **6**, 74–77 (2005).
- 261 8. Kalinin, S. *et al.* A toolkit and benchmark study for FRET-restrained high-precision structural modeling. *Nat.*
- 262 *Methods* **9**, 1218–1225 (2012).
- 263 9. Hellenkamp, B., Wortmann, P., Kandzia, F., Zacharias, M. & Hugel, T. Multidomain structure and correlated
- 264 dynamics determined by self-consistent FRET networks. **14**, (2017).
- 265 10. Peulen, T. O., Opanasyuk, O. & Seidel, C. A. M. Combining Graphical and Analytical Methods with Molecular
- 266 Simulations to Analyze Time-Resolved FRET Measurements of Labeled Macromolecules Accurately. *J. Phys.*
- 267 *Chem. B* **121**, 8211–8241 (2017).
- 268 11. Craggs, T. D. & Kapanidis, A. N. Six steps closer to FRET-driven structural biology. *Nat. Methods* **9**, 1157–1159
- 269 (2012).
- 270 12. Uphoff, S. *et al.* Monitoring multiple distances within a single molecule using switchable FRET. *Nat. Methods* **7**,
- 271 831–836 (2010).
- 272 13. Giannone, G. *et al.* Dynamic superresolution imaging of endogenous proteins on living cells at ultra-high density.
- 273 *Biophys. J.* **99**, 1303–1310 (2010).
- 274 14. Schoen, I., Ries, J., Klotzsch, E., Ewers, H. & Vogel, V. Binding-activated localization microscopy of DNA I. *Nano*
- 275 *Lett.* **11**, 4008–4011 (2011).
- 276 15. Sharonov, A. & Hochstrasser, R. M. Wide-field subdiffraction imaging by accumulated binding of diffusing probes.
- 277 *Proc. Natl. Acad. Sci. U. S. A.* **103**, 18911–18916 (2006).
- 278 16. Jungmann, R. *et al.* Super-Resolution Microscopy by Fluorescence Imaging of Transient Binding on DNA Origami.
- 279 4756–4761 (2010). doi:10.1021/nl103427w
- 280 17. Jungmann, R. *et al.* Multiplexed 3D cellular super-resolution imaging with DNA-PAINT and Exchange-PAINT.
- 281 *Nat. Methods* **11**, 313–318 (2014).
- 282 18. Dai, M., Jungmann, R. & Yin, P. Optical imaging of individual biomolecules in densely packed clusters. *Nat.*
- 283 *Nanotechnol.* **11**, 798–807 (2016).
- 284 19. Schnitzbauer, J., Strauss, M. T., Schlichthaerle, T., Schueder, F. & Jungmann, R. Super-resolution microscopy with
- 285 DNA-PAINT. *Nat. Protoc.* **12**, 1198–1228 (2017).
- 286 20. Chandradoss, S. D. *et al.* Surface passivation for single-molecule protein studies. *J. Vis. Exp.* 4–11 (2014).
- 287 doi:10.3791/50549
- 288 21. Filius, M. *et al.* High-Speed Super-Resolution Imaging Using Protein-Assisted DNA-PAINT. *Nano Lett.* (2020).
- 289 doi:10.1021/acs.nanolett.9b04277
- 290 22. Auer, A., Strauss, M. T., Schlichthaerle, T. & Jungmann, R. Fast, Background-Free DNA-PAINT Imaging Using
- 291 FRET-Based Probes. *Nano Lett.* **17**, 6428–6434 (2017).

## 292 MATERIALS AND METHODS

### 293 Single-Molecule Setup

294 All experiments were performed on a custom-built microscope setup. An inverted  
295 microscope (IX73, Olympus) with prism-based total internal reflection was used. In  
296 combination with a 532 nm diode-pumped solid-state laser (Compass 215M/50mW,  
297 Coherent). A 60x water immersion objective (UPLSAPO60XW, Olympus) was used for the  
298 collection of photons from the Cy3 and Cy5 dyes on the surface, after which a 532 nm long  
299 pass filter (LDP01-532RU-25, Semrock) blocks the excitation light. A dichroic mirror (635  
300 dcxr, Chroma) separates the fluorescence signal which is then projected onto an EM-CCD  
301 camera (iXon Ultra, DU-897U-CS0-#BV, Andor Technology). A series of EM-CDD images  
302 was recorded using custom-made program in Visual C++ (Microsoft).

303

### 304 Single-Molecule Data Acquisition

305 Single-molecule flow cells were prepared as previously described.<sup>20,21</sup> In brief, to avoid non-  
306 specific binding, quartz slides (G. Finkerbeiner Inc) were acidic piranha etched and  
307 passivated twice with polyethylene glycol (PEG). The first round PEGylation was performed  
308 with mPEG-SVA (Laysan Bio) and PEG-biotin (Laysan Bio), followed by a second round of  
309 PEGylation with MS(PEG)<sub>4</sub> (ThermoFisher). After assembly of a microfluidic chamber, the  
310 slides were incubated with 20  $\mu$ L of 0.1 mg/mL streptavidin (Thermofisher) for 2 minutes.  
311 Excess streptavidin was removed with 100  $\mu$ L T50 (50mM Tris-HCl, pH 8.0, 50 mM NaCl).  
312 Next, 50  $\mu$ L of 75 pM Cy5 labeled ssDNA was added to the microfluidic chamber. After 2  
313 minutes of incubation, unbound ssDNA was washed away with 100  $\mu$ L T50. For experiments  
314 in Figure 1, 50  $\mu$ L of 10 nM donor labeled imager strands in imaging buffer (50 mM Tris-  
315 HCl, pH 8.0, 500 mM NaCl, 100 mM MgCl<sub>2</sub>, 0.8 % glucose, 0.5 mg/mL glucose oxidase  
316 (Sigma), 85 ug/mL catalase (Merck) and 1 mM Trolox (Sigma)) was injected. All single-  
317 molecule FRET experiments were performed at room temperature ( $23 \pm 2$  °C).

318

### 319 FRET X Imaging (Figures 2 and 3)

320 For FRET X imaging in Figures 2 and 3, 50  $\mu$ L of 75 pM target DNA strands were  
321 immobilized and the unbound DNA was washed away with 100  $\mu$ L T50 after 2 minutes of  
322 incubation. Next, an imaging buffer containing the imager strand for POI A (**Figure 2**), or  
323 imager strand with internal nucleotides labeled at position 1 (**Figure 3**), was injected. After  
324 obtaining 2000 frames at 100 ms exposure time, the microfluidic chamber was washed with  
325 1000  $\mu$ L T50 and the imager strand for POI B (**Figure 2**), or internally labeled nucleotide

326 position 2 (**Figure 3**), was injected. This cycle was repeated until all internally labeled  
327 nucleotides were measured for Figure 3.

328

329 *FRET X experiments for Single molecule Structural Analysis (Figure 4)*

330 For buffer exchange and imaging of the same molecules in a single field of view for different  
331 rounds of FRET X imaging, tubing was connected to the inlet and outlet of the microfluidic  
332 chamber. One of the tubes was connected to a buffer reservoir and the other was connected to  
333 a syringe. By gently pulling on the syringe, the washing buffers and imaging solutions were  
334 exchanged without perturbing the sample stage.

335 For the branched DNA constructs experiments, 50  $\mu\text{L}$  of 75 pM branched DNA target  
336 strand was immobilized for 2 minutes and unbound DNA was removed with 100  $\mu\text{L}$  T50. To  
337 increase the probability of energy transfer between donor and acceptor fluorophores, the  
338 acceptor imager strand was designed to have a dissociation rate of  $\sim 0.1 \text{ s}^{-1}$ .<sup>22</sup> For long term  
339 acquisition, a 50  $\mu\text{L}$  imaging solution consisting of 100 nM acceptor imager strand and 10  
340 nM of donor labeled imager strand for POI A was injected and the chamber was imaged for  
341 15 minutes at 100 ms exposure time. Then the imaging solution for POI A was removed by  
342 washing with 1000  $\mu\text{L}$  T50 and the imaging solution of POI B was added (50  $\mu\text{L}$  of 100 nM  
343 acceptor imager strand and 10 nM of imager strand for POI B in imaging buffer). After this  
344 second round of imaging, the microfluidic chamber was washed with 1000  $\mu\text{L}$  T50 and POI  
345 A was imaged again by injecting fresh imaging solution for POI A.

346

### 347 **Data Analysis**

348 CCD images were analyzed using a custom code written in IDL (ITT Visual Information  
349 Solution) to find the position of individual FRET pairs and to extract fluorescence time  
350 traces. When the same field of view is measured multiple times (**Figure 4**), drift correction  
351 between the measurements and trace extraction were performed by a custom-built code  
352 written in Python (Python 3.7). For visualization of single molecule fluorescence and FRET  
353 time traces, we used a custom code written in Matlab (Mathworks). For automated detection  
354 of individual fluorescence barcode binding events, we used a custom Python code (Python  
355 3.7) utilizing a two-state K-means clustering algorithm on the sum of the donor and acceptor  
356 fluorescence intensities of individual molecules to identify the frames with high intensities.  
357 [Kim et, al, in preperation] To avoid false positive detections, only binding events that lasted for more  
358 than three consecutive frames were selected for further analysis. FRET efficiencies for each  
359 barcode binding events were calculated and used to build the FRET kymograph and

360 histogram. Populations in the FRET histogram are automatically classified by using Gaussian  
361 mixture modeling and used to determine the presence of specific barcodes of interest. The  
362 automated analysis code in Python is freely available at  
363 ([https://github.com/kahutia/transient\\_FRET\\_analyzer2](https://github.com/kahutia/transient_FRET_analyzer2)).

364

365

366

367

### 368 **ACKNOWLEDGEMENTS**

369 We thank Viktorija Globyte for critical reading and feedback. C.J. was supported by Vrije  
370 Programma (SMPS) of the Foundation for Fundamental Research on Matter and Human  
371 Frontier Science Program (RGP0026/2019).

372

373

### 374 **AUTHOR CONTRIBUTIONS**

375 M.F. and C.J. initiated and designed the project. M.F. and S.H.K. performed the experiments.  
376 S.H.K and I.S. wrote the analysis software. M.F., S.H.K., C.J. analysed and discussed the  
377 data. M.F. and C.J. wrote the manuscript. All authors read and improved the manuscript.

378

379
